# Supplementary material
Source: Springer Nature journal article supplement (https://www.springermedizin.de/resource/supplementary/13229_2014_143_MOESM20_ESM.pdf/9676258)

**a**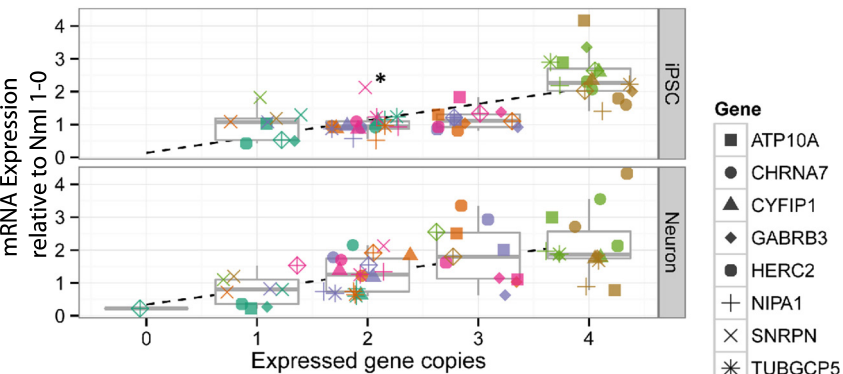**b**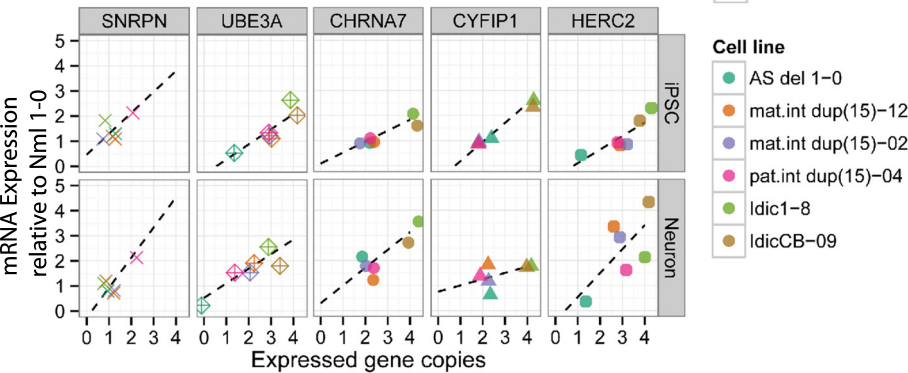

Supplement: MOESM20 [file 9676258]
